# Supplementary material
Source: Springer Nature journal article supplement (https://www.springermedizin.de/resource/supplementary/12936_2013_2883_MOESM1_ESM.pdf/9544476)

# Additional file 1 Indoor resting vector densities in different months at different study sites in 2010 (A) and 2011 (B)

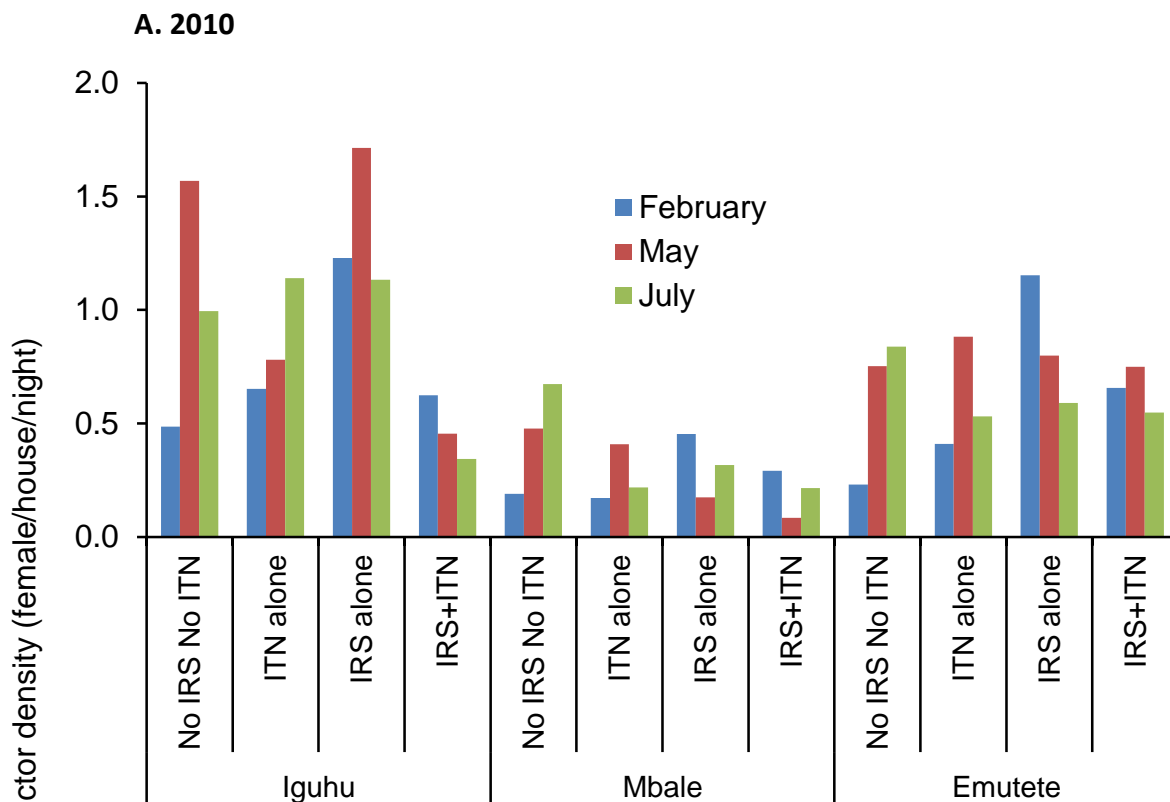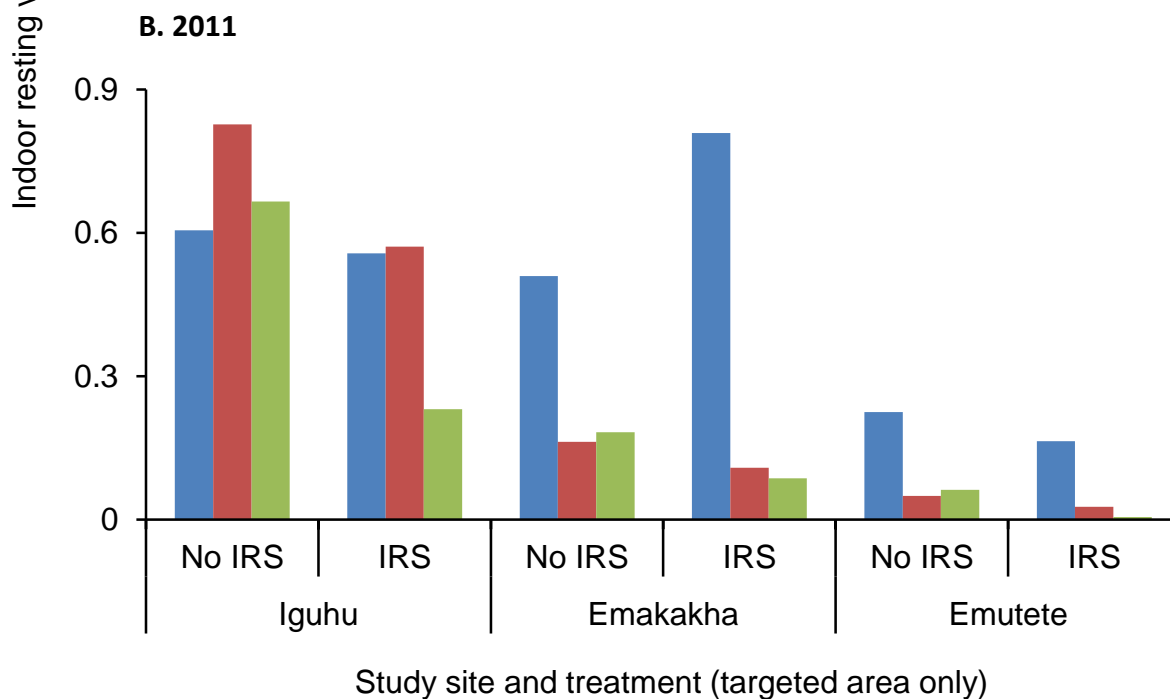

Supplement: MOESM1 [file 9544476]
